# Supplementary material for: Phylogeographic analysis of hemorrhagic fever with renal syndrome patients using multiplex PCR-based next generation sequencing
Source: PubMed Central journal article supplement (PMC4879520; doi:10.1038/srep26017), 2016-05-25
Supplement: srep26017-s1.pdf [file srep26017-s1.pdf]

Phylogeographic analysis of hemorrhagic fever with renal syndrome patients using multiplex PCR-based next generation sequencing

Won-Keun Kim, Jeong-Ah Kim, Dong Hyun Song, Daesang Lee, Yong Chul Kim, Sook-Young Lee, Seung-Ho Lee, Jin Sun No, Ji Hye Kim, Jeong Hoon Kho, Se Hun Gu, Seong Tae Jeong, Michael Wiley, Heung-Chul Kim, Terry A. Klein, Gustavo Palacios, and Jin-Won Song

Supplementary Table S1. Multiplex PCR primer lists of HTNV L, M, and S segments

| L segment |                        | M segment |                          | S segment |                        |
|-----------|------------------------|-----------|--------------------------|-----------|------------------------|
| Primer    | Sequence (5' -> 3')    | Primer    | Sequence (5' -> 3')      | Primer    | Sequence (5' -> 3')    |
| HNL01F    | TAGTAGTAGACTCCGGGAAGT  | HNM01F    | TAGTAGTAGACTCCGAAAATAAAG | HNS01F    | TAGTAGTAGGCTCCCTAAAG   |
| HNL02F    | GTAGAGTGTATAGATTATCT   | HNM02F    | AATGTCTATGACATGAAAAAT    | HNS02F    | GGCAGAAGGTAAGGGATGCA   |
| HNL03F    | AGGCAATAGGGAAAGTACTA   | HNM03F    | CAGCACAGCTGGTGCCTGAG     | HNS03F    | GGCAAAGATTGATGAGTTAA   |
| HNL04F    | CAAGGCCTTTTCAAGATGA    | HNM04F    | TCAGTACAGCTTAGCCAAA      | HNS04F    | CATCTGAAAGAGAGATCAAT   |
| HNL05F    | AGAGAAAAGAAGCTTAAATA   | HNM05F    | CGCAGTAGAAAATCAATAAC     | HNS05F    | TTGTTGTCTATCTTACATCC   |
| HNL06F    | CATTTAATGTAGTGGCAGTT   | HNM06F    | TGAAAAGCTGTTTTGATTGCA    | HNS06F    | TCGGATTGATTTAAGGATG    |
| HNL07F    | AGCTGAGATAAGTTACGTTA   | HNM07F    | CCCAGATCAGAGTGTGGTCA     | HNS07F    | AAGGCAGAAGAGATTACACC   |
| HNL08F    | AGCCAGCCATATTACATACC   | HNM08F    | AAAAATTTTGAACAGGTTAA     | HNS08F    | TGATTGGTTTCTGGCATTG    |
| HNL09F    | GAAATTTTTTCATTTTTTGAA  | HNM09F    | CACCAATTTATGTTCCAACA     | HNS09F    | CCTTGGTGGCTCTCAACAA    |
| HNL10F    | TAGAAACTTCTTACTAATAC   | HNM10F    | AGAAACTGCAACTTACTCTA     | HNS10F    | GAAGCAGCTGGCTGTAGCAT   |
| HNL11F    | CTGAACCTAATTCAGATAC    | HNM11F    | TCCTATTCTTCCCTTAGTAT     | HNS11F    | TAGCAGGTATTGCTGAGCTT   |
| HNL12F    | CAGCAATACAATTTAAACAG   | HNM12F    | GTGCCATACCACACTGTGG      | HNS12F    | GGCAAAGAAATCATCTTCT    |
| HNL13F    | ACTCAATAATCATAAAAAGTG  | HNM13F    | ATCATGTGAGGCCTTTTCTG     | HNS13F    | GGAAAGGAGGCTGTGGACAA   |
| HNL14F    | AAAATATTGCTGATTTAGA    | HNM14F    | AAATTTGTATGTCAGCGAGT     | HNS14F    | CCAACCAAGACCTTTAAAA    |
| HNL15F    | TTCAGAATGAGACCCAGAAG   | HNM15F    | ACACTATAACAAGCTTATTT     | HNS15F    | TTATCAGGGGAATCAGTATA   |
| HNL16F    | TCATTCAGGATTA AAAAGAT  | HNM16F    | GCTTGTACATTTCTGTTTTG     | HNS16F    | AGGCTGCCTTAAGTAGCCTT   |
| HNL17F    | GGTTCCTTTATTAGGTTTCA   | HNM17F    | CAAGAAAACAGGTTAAAATC     | HNS17F    | TACTAACAAACACACTCTAC   |
| HNL18F    | GGGTATCCAAAGTCATGAGC   | HNM18F    | CCTATAAAGAGTTGAAGGCA     | HNS01R    | CTCATCGGATCTTCCAT      |
| HNL19F    | TACAGAAGACCAAGGGCAGT   | HNM19F    | TTACAAAAGTATGCCAAGTTA    | HNS02R    | CAGTTGCAATCTTATCTGCC   |
| HNL20F    | ATTTTGGACAATCTACGTTA   | HNM20F    | TTTAAAGTACAAAAGTAGGTTG   | HNS03R    | TTTAAATCCAGCATTACC     |
| HNL21F    | CATTAGAGGTATATATATAT   | HNM21F    | CTCCTGTCTGGAATGACAAT     | HNS04R    | TAGAGCTTTCAGAAGTATCG   |
| HNL22F    | AACAGTGGACCAGTTCGACTG  | HNM22F    | CCGTAGGAAGTAAACAAACC     | HNS05R    | GGATACCCTTAACGTCCTCG   |
| HNL23F    | ACCTGTTTTCTTTTATTGTA   | HNM23F    | CACCTGGTTGTAGTGGCTGCT    | HNS06R    | AGTCCACAGACTGCTGTCT    |
| HNL24F    | AGGAAGA AAAAGTATGGGGAA | HNM24F    | AAAGGGATTACCAATATGAG     | HNS07R    | TTGTTCAATACGATCACTCC   |
| HNL25F    | TGCTGTTGAGTTGGCAGCAA   | HNM25F    | GAAACCAGTTGGCAGTGCCT     | HNS08R    | CCACTTGCCTGCTGCGTAAG   |
| HNL26F    | TTTAGCCAAAACAAGAAATAT  | HNM26F    | AATGACTGTTTTGTATCTAG     | HNS09R    | ATTGATGATGCTGACTCAAT   |
| HNL27F    | ATTTATCAAATTC AAGACAT  | HNM27F    | GTGGCGGTCTAATATTTAAA     | HNS10R    | CATGTCCTGCAGGATGGAAA   |
| HNL28F    | AGAGGCAGATAGGGGCTTTT   | HNM28F    | AGGGTTTACATTAACATGTC     | HNS11R    | TTGATTGTGCTTCTGAGA     |
| HNL29F    | GAGTACATATCATATGGAGG   | HNM29F    | ATTGATTCCTTTCAATCTTT     | HNS12R    | TCAGGATCCATATCATCCCC   |
| HNL30F    | GTAATCATAAATTCATTAGG   | HNM30F    | TCTTAGTAAACAAAAGACATC    | HNS13R    | TA AAAAGGATTAATACATTCA |
| HNL31F    | TACCTCCATGCTACATAATG   | HNM31F    | AGGGTTTACATTAACATGTC     | HNS14R    | TTCCCAACCAAAAATGTTCC   |
| HNL32F    | AAACTAAGGAATCATATTGA   | HNM32F    | GTAACATTAACAAGAGGACA     | HNS15R    | AAATGAAATCTACATCCATA   |
| HNL33F    | ACTGGCTGCAGGGTAACTTA   | HNM33F    | TTGGACTCCATGCTGCTGCA     | HNS16R    | GTAGTTAAGTTGAGGTAGTT   |
| HNL34F    | TACTCTTTTGTAGTTTGCAC   | HNM34F    | AAAATGTTGGTTTGTGTAAT     | HNS17R    | GTAGTAGTTTTGCTCCCTAA   |
| HNL35F    | CAACAGATTCAAGCAGGCCA   | HNM35F    | GTTTACTGAGCATTCTCTG      |           |                        |
| HNL36F    | TTAAGATCTACCAAAGAAA    | HNM36F    | TTTTTATATTCCAGTATAAT     |           |                        |
| HNL37F    | ACTCTTAGGTTCTCTGTGAG   | HNM01R    | TCCCCGAAGCTTACTGTGTG     |           |                        |
| HNL38F    | CCTCAGGTTGCACAAGTAGC   | HNM02R    | TGATTGGTGATTATCCATGC     |           |                        |
| HNL39F    | AAGTTAAGCATGCTGATACA   | HNM03R    | CAACTTCACTAGACACTGTC     |           |                        |
| HNL40F    | ATTA AAGCGCGCACTTCTAG  | HNM04R    | TAAGTACTATTGCAGTATAG     |           |                        |
| HNL41F    | TTTCAACATGAGAGGTTAGG   | HNM05R    | ATAAACTACCTGTACTCTGT     |           |                        |
| HNL42F    | CAAAAATTTTAGAGTTATGG   | HNM06R    | CGATATCAAAGATCCCATGC     |           |                        |
| HNL43F    | TGACCCAAAGTATTGTTACAG  | HNM07R    | GTATCATTCAGTATTGTTTC     |           |                        |
| HNL44F    | GAATGGGTTACCTTCAGGGA   | HNM08R    | GAATGCTTCCATGGATCTGA     |           |                        |
| HNL45F    | GTTGTACATTTCTAAAAGAG   | HNM09R    | GAGGAACTTTGCAATTGGCA     |           |                        |
| HNL46F    | AACATTCACAGTCAGAGAAA   | HNM10R    | ACATGTTTGGCTTCTGTTGA     |           |                        |
| HNL47F    | CTGGATACAGCCAAGTTCCC   | HNM11R    | ATAATATCCAGGTAATCAA      |           |                        |
| HNL48F    | TTATGAAAAGAAATGCACCT   | HNM12R    | TGGGGGAGGTTATGTTGAAA     |           |                        |
| HNL49F    | CTGGCTGAAATCAATGTCAC   | HNM13R    | CCATTGCAGTACACAACGAT     |           |                        |
| HNL50F    | CAACAGA AAGACTTAGCTGC  | HNM14R    | AATAGAGTGTGTTACCCAG      |           |                        |
| HNL51F    | TCGAGGATAAGACCTTTTCA   | HNM15R    | TAAATGTGATTGCTGGTATA     |           |                        |
| HNL52F    | TATAAAGGGTGATTATTCAG   | HNM16R    | TCAAACCTTTCCTTTATCTT     |           |                        |
| HNL53F    | ACAAAGCTTTATGAAGGAGA   | HNM17R    | GCATTGAGACTGGGGCATG      |           |                        |
| HNL54F    | CATCAATTACACAGAAGCAT   | HNM18R    | TTTTCTTTAGATCATCCCTG     |           |                        |
| HNL55F    | AGTACGGCACATGGTATTGT   | HNM19R    | AGAAGAAAATCCACATTGT      |           |                        |
| HNL56F    | CTTAGAACACACAGGCAAT    | HNM20R    | GTGCATAGGAACAGAACCCA     |           |                        |
| HNL57F    | TATTAGCTCATGCGTTTCAT   | HNM21R    | GTAGATCAATGGATTGTGCT     |           |                        |
| HNL58F    | AAATCCCATCATTTTCACTG   | HNM22R    | CCATAACAGTGA AAGGATGT    |           |                        |
| HNL59F    | ATATCTGTTGATCTCTTTAT   | HNM23R    | ACAATCTGATGGATTACAAC     |           |                        |
| HNL60F    | GTA CTGTGAGTTCAATGTCA  | HNM24R    | TCCTGCTATACCTTATTGTG     |           |                        |
| HNL61F    | TGTGGATTTTGAGAATATAG   | HNM25R    | ATTGTACCAATTAACAGAC      |           |                        |
| HNL62F    | GAATCAAAGAAAATGAGGGG   | HNM26R    | GCCAAATGACATGTGGATG      |           |                        |
| HNL63F    | CTGTTAATATATCTTAATG    | HNM27R    | AAATAGGAGTAGTAGCAAAG     |           |                        |
| HNL64F    | GAGCATTTGCTCAGGATGGG   | HNM28R    | TCATCAGTAAAGTGCATAGT     |           |                        |
| HNL65F    | GATGTCATCTCTGATTTCATT  | HNM29R    | GCAAGGATTTTCCACCAAGGT    |           |                        |
| HNL01R    | ATGTCATGCTCACGGCGTA    | HNM30R    | AAAAGGTAGGACATTCTGTT     |           |                        |
| HNL02R    | TATAATGTTTGAAGGGACCC   | HNM31R    | CCACCTTTTCTGACACCTT      |           |                        |
| HNL03R    | TTGTTCCATTAATTTTATAA   | HNM32R    | AGAAATCCCATTGACCTTGT     |           |                        |

|        |                       |        |                          |
|--------|-----------------------|--------|--------------------------|
| HNL04R | TCTGTGTTCAATATAAGCTAA | HNM33R | CACTGAATATCCCTGAAATC     |
| HNL05R | TTGTGTAGTAATATTGGAGC  | HNM34R | AGCTATGACTTTTTATGCTT     |
| HNL06R | CTCTCCTCAGTTCTGATC    | HNM35R | GCTACTATTTTTTTTAGTG      |
| HNL07R | GCTCCTATCGGTTCCATCCC  | HNM36R | TAGTAGTAGACTCCGAAAATGTTA |
| HNL08R | AAAGCACTCGAACACTGCTG  |        |                          |
| HNL09R | CAGGTTTGTAAGATGTGATT  |        |                          |
| HNL10R | GCCATGTCATGGATCAGGTA  |        |                          |
| HNL11R | AAATGTTCTGGCTCTCTTA   |        |                          |
| HNL12R | GACTCTCTATTTGCGCACCA  |        |                          |
| HNL13R | TCTTGAGTTGATGGCTCAGT  |        |                          |
| HNL14R | TGTTGTCTTTTTCAACACAT  |        |                          |
| HNL15R | TATTGTATGAGTGTAAAGGAC |        |                          |
| HNL16R | ACTAAACCAGGTCCTATCCT  |        |                          |
| HNL17R | ATTTAATGCTAGCAGCCTAT  |        |                          |
| HNL18R | ACACAGATCTAATTGCATAT  |        |                          |
| HNL19R | GAGTATAATGATGTCACTGC  |        |                          |
| HNL20R | AAGTGCAACTAACAAGCTTT  |        |                          |
| HNL21R | TAAATGAAGGGTAAACTCCA  |        |                          |
| HNL22R | TCTTCATTCATTTTTCCATG  |        |                          |
| HNL23R | CCACATCATATATCCATTTT  |        |                          |
| HNL24R | ACTTTGTAGCCAGGACTTTA  |        |                          |
| HNL25R | TGAACCTGTCCTGACATACC  |        |                          |
| HNL26R | CTCCTCATATAAATTTAAGA  |        |                          |
| HNL27R | GCCTGCATCTAGTAGGAAGT  |        |                          |
| HNL28R | GCCCTTGGATTGCAAGAAT   |        |                          |
| HNL29R | TGCACTAACATACATGAGTT  |        |                          |
| HNL30R | CACAGTTCTTTAGCTTATTG  |        |                          |
| HNL31R | TTGATGTGTGGGTCAAGGCT  |        |                          |
| HNL32R | TGCAACACCGAAAAGCGAAG  |        |                          |
| HNL33R | CATAAATGAATAATGCATCG  |        |                          |
| HNL34R | ATCTCTGTATTTACACTAAA  |        |                          |
| HNL35R | AAATTCAGCATTGTTCGGGG  |        |                          |
| HNL36R | AATCGTCAAAAATAACCTAAA |        |                          |
| HNL37R | CTTCAACTTTACTGGTGCA   |        |                          |
| HNL38R | CATTGCACCATTCTCTCCA   |        |                          |
| HNL39R | GCATTGATTTCTGTCTTTG   |        |                          |
| HNL40R | CACTGTACTTTCCCAATAAA  |        |                          |
| HNL41R | AATATAATCATAAGTTACAT  |        |                          |
| HNL42R | GGAGCTGCAAGGGTGACTGC  |        |                          |
| HNL43R | TCTGCAAACTGTTAGCAGC   |        |                          |
| HNL44R | AATTCATTCAAGAAATCTT   |        |                          |
| HNL45R | CAGGAATACTATTTGTATG   |        |                          |
| HNL46R | ATTGTCTTTAAGTCAACAGA  |        |                          |
| HNL47R | TACCCTTGATTTAGAAGATT  |        |                          |
| HNL48R | TATGAGGCTTCACICTTATA  |        |                          |
| HNL49R | CATCTCCAAATTTCTATGCA  |        |                          |
| HNL50R | CCCAACCCTACAGAACCAT   |        |                          |
| HNL51R | ATGCTCGCCTGTTGGCTTGT  |        |                          |
| HNL52R | TCAAGACCAAAATTGAATGT  |        |                          |
| HNL53R | CGAAACCTCATCCATCATGA  |        |                          |
| HNL54R | TCCCCATTCAAATCCAGAC   |        |                          |
| HNL55R | TCCTTTATTGTAATCATAAA  |        |                          |
| HNL56R | TACTGTTGATACCTAATAT   |        |                          |
| HNL57R | GAAGATTCTTCATAAAATTC  |        |                          |
| HNL58R | GGGTTAATCAGCTTAAGTAA  |        |                          |
| HNL59R | TAAGCTCATTCTTCAGACC   |        |                          |
| HNL60R | GTAGGAAATGTTCAATATCT  |        |                          |
| HNL61R | AGTCTGACAGGCTCAAGTAT  |        |                          |
| HNL62R | CAAATTAATGTTTTAGAGA   |        |                          |
| HNL63R | GATTTCAAACCTGATCAATA  |        |                          |
| HNL64R | AACAGTACCATGGTATGCCT  |        |                          |
| HNL65R | TTAGTAGTAGGTATGCTCCG  |        |                          |
