# Supplementary material for: Phylogeographic analysis of hemorrhagic fever with renal syndrome patients using multiplex PCR-based next generation sequencing
Source: PubMed Central journal article supplement (PMC4879520; doi:10.1038/srep26017), 2016-05-25
Supplement: srep26017-s2.pdf [file srep26017-s2.pdf]

**Phylogeographic analysis of hemorrhagic fever with renal syndrome patients using  
multiplex PCR-based next generation sequencing**

Won-Keun Kim, Jeong-Ah Kim, Dong Hyun Song, Daesang Lee, Yong Chul Kim, Sook-Young  
Lee, Seung-Ho Lee, Jin Sun No, Ji Hye Kim, Jeong Hoon Kho, Se Hun Gu, Seong Tae Jeong,  
Michael Wiley, Heung-Chul Kim, Terry A. Klein, Gustavo Palacios, and Jin-Won Song

**Supplementary Table S2. Accession number of HTNV strains from patients and rodents**  
(FP 131, Fire Point 131; NR, Nightmare Range; MPRC, Rodriguez Multi-Purpose Range Complex;  
DN, Dagmar North; TBTA-N, Twin Bridge Training Area North; TBTA-S, Twin Bridge Training  
Area South)

| No | Strain    | Collection site      | Accession number |           |           |
|----|-----------|----------------------|------------------|-----------|-----------|
|    |           |                      | L segment        | M segment | S segment |
| 1  | ROKA13-8  | Cheorwon             | KU207198         | KU207202  | KU207206  |
| 2  | ROKA14-11 | Paju (TBTA-S)        | KU207199         | KU207203  | KU207207  |
| 3  | US8A14-2  | Paju (DN)            | KU207200         | KU207204  | KU207208  |
| 4  | US8A15-1  | Pocheon              | KU207201         | KU207205  | KU207209  |
| 5  | Aa03-161  | Yeoncheon (FP131)    | KT934956         | KT934990  | KT935024  |
| 6  | Aa05-771  | Yeoncheon (FP131)    | KT934963         | KT934997  | KT935031  |
| 7  | Aa05-172  | Paju (DN)            | KT934974         | KT935008  | KT935042  |
| 8  | Aa05-188  | Paju (DN)            | KT934975         | KT935009  | KT935043  |
| 9  | Aa05-246  | Paju (DN)            | KU207175         | KU207183  | KU207191  |
| 10 | Aa04-722  | Pocheon (MPRC)       | KU207174         | KU207182  | KU207190  |
| 11 | Aa09-17   | Pocheon (NR)         | KU207176         | KU207184  | KU207192  |
| 12 | Aa09-410  | Pocheon (NR)         | KU207177         | KU207185  | KU207193  |
| 13 | Aa09-948  | Pocheon (NR)         | KT934966         | KT935000  | KT935034  |
| 14 | Aa10-123  | Paju (TBTA-S)        | KT934968         | KT935002  | KT935036  |
| 15 | Aa10-265  | Paju (TBTA-S)        | KU207178         | KU207186  | KU207194  |
| 16 | Aa14-204  | Paju (TBTA-S)        | KT934977         | KT935011  | KT935045  |
| 17 | Aa10-434  | Paju (TBTA N)        | KT934970         | KT935004  | KT935038  |
| 18 | Aa10-518  | Paju (TBTA N)        | KT934971         | KT935005  | KT935039  |
| 19 | Aa10-561  | Paju (TBTA N)        | KT934972         | KT935006  | KT935040  |
| 20 | Aa14-266  | Hwacheon (Samil-ri)  | KT934979         | KT935013  | KT935047  |
| 21 | Aa14-272  | Hwacheon (Samil-ri)  | KT934980         | KT935014  | KT935048  |
| 22 | Aa14-362  | Cheorwon (Guntan-ri) | KT934981         | KT935015  | KT935049  |

|    |             |                                  |          |          |          |
|----|-------------|----------------------------------|----------|----------|----------|
| 23 | Aa14-368    | Cheorwon (Guntan-ri)             | KT934982 | KT935016 | KT935050 |
| 24 | Aa14-386    | Cheorwon (Guntan-ri)             | KT934983 | KT935017 | KT935051 |
| 25 | Aa15-56     | Cheorwon (Jigyeong-ri/Munhye-ri) | KU207179 | KU207187 | KU207195 |
| 26 | Aa15-58     | Cheorwon (Jigyeong-ri/Munhye-ri) | KU207180 | KU207188 | KU207196 |
| 27 | Aa15-59     | Cheorwon (Jigyeong-ri/Munhye-ri) | KU207181 | KU207189 | KU207197 |
| 28 | Aa14-408    | Yanggu (Mandae-ri)               | KT934986 | KT935020 | KT935054 |
| 29 | Aa14-412    | Yanggu (Mandae-ri)               | KT934987 | KT935021 | KT935055 |
| 30 | Aa14-423    | Yanggu (Mandae-ri)               | KT934988 | KT935022 | KT935056 |
| 31 | HTNV 76-118 | Uijeongbu                        | NC005222 | M14627   | M14626   |
| 32 | HTNV HV004  | China                            | JQ083393 | JQ083394 | JQ083395 |
